# Supplementary material
Source: publisher site journal article supplement (https://www.dovepress.com/article/261441)
Supplement: Supplementary file 1 [file get_supplementary_file.php]

Supplementary Table 1. Chest wheezing and wheezing events number last 12 months at 22 years of age according to total score, components, tertiles, and continuity of Revised Brazilian Healthy Eating Index (IQD-R) from 18 to 22 years age stratified by body mass index classification at 18 years of age. 1993 Pelotas (Brazil) Birth Cohort. (n=2,986)

| Diet quality | **Wheezing last 12 months**  **at 22y *** | | | | | | | | | | | |  | | | **Wheezing events number last 12 months**  **at 22y **** | | | | | | | | | | | | |
| --- | --- | --- | --- | --- | --- | --- | --- | --- | --- | --- | --- | --- | --- | --- | --- | --- | --- | --- | --- | --- | --- | --- | --- | --- | --- | --- | --- | --- |
| Low/adequate weight | | | | | Overweight/obesity | | | | | | |  | | | Low/adequate weight | | | | | | | *Overweight/obesity* | | | | | |
| Crude | | Adjusted | | Crude | | | | Adjusted | | |  | | | Crude | | | | Adjusted | | | Crude | | | | Adjusted | |
| OR | 95%CI | OR | 95%CI | OR | | 95%CI | OR | | 95%CI |  | | | OR | | | 95%CI | OR | | 95%CI | OR | | | 95%CI | OR | | 95%CI | |
| At 18 y |  |  |  |  |  | |  |  | |  |  | | |  | | |  |  | |  |  | | |  |  | |  | |
| IQD-R score in tertile |  |  |  |  |  | |  |  | |  |  | | |  | | |  |  | |  |  | | |  |  | |  | |
| 1º (poor) | **1.96** | **1.36 - 2.81** | 1.57 | 0.99 - 2.48 | **3.09** | | **1.64 - 5.80** | **3.33** | | **1.53 - 7.25** |  | | | **1.90** | | | **1.32 - 2.73** | **1.65** | | **1.05 - 2.60** | **3.10** | | | **1.65 - 5.83** | **3.52** | | **1.64 -7.58** | |
| 2º (intermediate) | **1.67** | **1.42 - 2.43** | 1.43 | 0.91 - 2.24 | 1.86 | | 0.96 - 3.61 | 1.86 | | 0.83 - 4.16 |  | | | **1.63** | | | **1.12 - 2.38** | 1.46 | | 0.94 - 2.29 | 1.71 | | | 0.88 - 3.35 | 1.74 | | 0.79 - 3.85 | |
| 3º (good) | *ref* | *-* | *ref* | *-* | *ref* | | *-* | *ref* | | *-* |  | | | *ref* | | | *-* | *ref* | | *-* | *ref* | | | *-* | *ref* | | *-* | |
| At 22y |  |  |  |  |  | |  |  | |  |  | | |  | | |  |  | |  |  | | |  |  | |  | |
| IQD-R score in tertile |  |  |  |  |  | |  |  | |  |  | | |  | | |  |  | |  |  | | |  |  | |  | |
| 1º (poor) | **1.54** | **1.10 - 2.17** | **1.88** | **1.21 - 2.90** | **1.81** | | **1.02 - 3.24** | **2.15** | | **1.01 - 4.59** |  | | | **1.52** | | | **1.08 - 2.15** | **1.83** | | **1.19 - 2.82** | **1.83** | | | **1.01 - 3.31** | **2.31** | | **1.10 - 4.88** | |
| 2º (intermediate) | 0.99 | 0.69 - 1.44 | 1.20 | 0.76 - 1.90 | 1.50 | | 0.83 - 2.70 | 1.86 | | 0.88 - 3.92 |  | | | 0.99 | | | 0.68 - 1.44 | 1.15 | | 0.73 - 1.81 | 1.58 | | | 0.87 - 2.88 | **2.14** | | **1.02 - 4.47** | |
| 3º (good) | *ref* | *-* | *ref* | *-* | *ref* | | *-* | *ref* | | *-* |  | | | *ref* | | | *-* | *ref* | | *-* | *ref* | | | *-* | *ref* | | *-* | |
| From 18 y to 22 y |  |  |  |  |  | |  |  | |  |  | | |  | | |  |  | |  |  | | |  |  | |  | |
| IQD-R continuity in tertile |  |  |  |  |  | |  |  | |  |  | | |  | | |  |  | |  |  | | |  |  | |  | |
| Always poor | **2.62** | **1.56 - 4.40** | **2.52** | **1.30 - 4.87** | **5.61** | | **1.87 - 16.84** | **6.21** | | **1.83 - 21.13** |  | | | **2.52** | | | **1.50 - 4.24** | **2.49** | | **1.30 - 4.78** | **5.84** | | | **1.95 - 17.53** | **6.72** | | **2.04 - 22.14** | |
| Intermediate | **1.65** | **1.03 - 2.62** | **1.88** | **1.07 - 3.30** | **3.33** | | **1.18 - 9.36** | 2.86 | | 0.94 - 8.72 |  | | | 1.60 | | | 1.00 - 2.55 | **1.79** | | **1.03 - 3.13** | **3.16** | | | **1.12 - 8.91** | 2.63 | | 0.88 - 7.89 | |
| Always good | *ref* | *-* | *ref* | *-* | *ref* | | *-* | *ref* | | *-* |  | | | *ref* | | | *-* | *ref* | | *-* | *ref* | | | *-* | *ref* | | *-* | |

**p value<0.05**

* Logistic regression

** Ordinal logistic regression

Adjustment variables: sex, skin color, assets index, participant schooling, head of a family schooling, maternal history of asthma, alcohol abuse, physical activity, corticosteroid or inhaler use, and wheezing at 18 years of age.

Supplementary Table 2. Chest wheezing and wheezing events number last 12 months at 22 years of age according to total score, components, tertiles, and continuity of Revised Brazilian Healthy Eating Index (IQD-R) from 18 to 22 years age stratified by smoking status at 18 years of age. 1993 Pelotas (Brazil) Birth Cohort. (n=2,986)

| Diet quality | **Wheezing last 12 months**  **at 22y *** | | | | | | | | |  | **Wheezing events number last 12 months**  **at 22y **** | | | | | | | | |
| --- | --- | --- | --- | --- | --- | --- | --- | --- | --- | --- | --- | --- | --- | --- | --- | --- | --- | --- | --- |
| Non-smoking | | | | | Smoker | | | |  | Non-smoking | | | | *Smoker* | | | | |
| Crude | | Adjusted | | | Crude | | Adjusted | |  | Crude | | Adjusted | | Crude | | Adjusted | |
| OR | 95%CI | OR | 95%CI | OR | | 95%CI | OR | 95%CI |  | OR | 95%CI | OR | 95%CI | OR | 95%CI | OR | 95%CI | |
| At 18 y |  |  |  |  |  | |  |  |  |  |  |  |  |  |  |  |  |  | |
| IQD-R score in tertile |  |  |  |  |  | |  |  |  |  |  |  |  |  |  |  |  |  | |
| 1º (poor) | **1.82** | **1.26 - 2.63** | **1.74** | **1.11 - 2.72** | **2.67** | | **1.38 - 5.18** | **3.12** | **1.28 - 7.57** |  | **1.78** | **1.24 - 2.58** | **1.78** | **1.14 - 2.78** | 2.65 | 1.37 - 5.14 | **3.31** | **1.39 - 7.87** | |
| 2º (intermediate) | 1.38 | 0.94 - 2.01 | 1.34 | 0.86 - 2.08 | **2.61** | | **1.31 - 5.20** | **2.74** | **1.10 - 6.84** |  | 1.36 | 0.93 - 1.99 | 1.35 | 0.87 - 2.08 | 2.38 | 1.19 - 4.78 | **2.49** | **1.02 - 6.10** | |
| 3º (good) | *ref* | *-* | *ref* | *-* | *ref* | | *-* | *ref* | *-* |  | *ref* | *-* | *ref* | *-* | *ref* | *-* | *ref* | *-* | |
| At 22y |  |  |  |  |  | |  |  |  |  |  |  |  |  |  |  |  |  | |
| IQD-R score in tertile |  |  |  |  |  | |  |  |  |  |  |  |  |  |  |  |  |  | |
| 1º (poor) | **1.70** | **1.19 - 2.43** | **2.01** | **1.30 - 3.11** | 1.14 | | 0.67 - 1.93 | 1.79 | 0.84 - 3.82 |  | **1.64** | **1.14 - 2.35** | **1.95** | **1.26 - 3.01** | 1.21 | 0.70 - 2.07 | 1.80 | 0.85 - 3.78 | |
| 2º (intermediate) | 1.11 | 0.76 - 1.63 | 1.27 | 0.81 - 2.00 | 0.95 | | 0.54 - 1.64 | 1.61 | 0.74 - 3.49 |  | 1.10 | 0.75 - 1.62 | 1.30 | 0.83 - 2.02 | 0.99 | 0.57 - 1.74 | 1.58 | 0.74 - 3.36 | |
| 3º (good) | *ref* | *-* | *ref* | *-* | *ref* | | *-* | *ref* | *-* |  | *ref* | *-* | *ref* | *-* | *ref* | *-* | *ref* | *-* | |
| From 18 y to 22 y |  |  |  |  |  | |  |  |  |  |  |  |  |  |  |  |  |  | |
| IQD-R continuity in tertile |  |  |  |  |  | |  |  |  |  |  |  |  |  |  |  |  |  | |
| Always poor | **2.87** | **1.67 - 4.96** | **3.28** | **1.71 - 6.29** | 2.38 | | 0.93 - 6.09 | 3.36 | 0.87 - 12.93 |  | **2.76** | **1.60 - 4.78** | **3.23** | **1.69 - 6.16** | 2.45 | 0.96 - 6.24 | 3.52 | 0.94 - 13.19 | |
| Intermediate | **1.74** | **1.07 - 2.82** | **1.99** | **1.14 - 3.45** | 1.83 | | 0.76 - 4.44 | 2.63 | 0.75 - 9.29 |  | **1.72** | **1.06 - 2.79** | **1.92** | **1.11 - 3.32** | 1.70 | 0.70 - 4.12 | 2.27 | 0.65 - 7.91 | |
| Always good | *ref* | *-* | *ref* | *-* | *ref* | | *-* | *ref* | *-* |  | *ref* | *-* | *ref* | *-* | *ref* | *-* | *ref* | *-* | |

**p value<0.05**

* Logistic regression

** Ordinal logistic regression

Adjustment variables: sex, skin color, assets index, participant schooling, head of a family schooling, maternal history of asthma, alcohol abuse, physical activity, corticosteroid or inhaler use, and wheezing at 18 years of age.

Supplementary Table 3. Chest wheezing and wheezing events number last 12 months at 22 years of age according to total score, components, tertiles, and continuity of Revised Brazilian Healthy Eating Index (IQD-R) from 18 to 22 years age in participants without wheezing at 18 years of age. 1993 Pelotas (Brazil) Birth Cohort. (n=2,986)

| Diet quality | **Wheezing last 12 months**  **at 22y *** | | | |  | **Wheezing events number last 12 months**  **at 22y **** | | | | |
| --- | --- | --- | --- | --- | --- | --- | --- | --- | --- | --- |
| Crude | | Adjusted | |  | Crude | | Adjusted | | |
| OR | 95%CI | OR | 95%CI |  | OR | 95%CI | | OR | 95%CI | |
| At 18 y |  |  |  |  |  |  |  | |  |  | |
| IQD-R score in tertile |  |  |  |  |  |  |  | |  |  | |
| 1º (poor) | **2.00** | **1.35 - 2.94** | **1.76** | **1.11 - 2.78** |  | **1.95** | **1.32 - 2.88** | | **1.77** | **1.12 - 2.79** | |
| 2º (intermediate) | 1.50 | 0.99 - 2.25 | 1.25 | 0.78 - 1.99 |  | 1.50 | 0.99 - 2.25 | | 1.20 | 0.75 - 1.92 | |
| 3º (good) | *ref* | *-* | *ref* | *-* |  | *ref* | *-* | | *ref* | *-* | |
| At 22y |  |  |  |  |  |  |  | |  |  | |
| IQD-R score in tertile |  |  |  |  |  |  |  | |  |  | |
| 1º (poor) | **1.58** | **1.09 - 2.31** | **1.81** | **1.16 - 2.84** |  | **1.60** | **1.10 - 2.34** | | **1.77** | **1.14 - 2.77** | |
| 2º (intermediate) | 1.16 | 0.78 - 1.73 | 1.27 | 0.80 - 2.03 |  | 1.18 | 0.80 - 1.76 | | 1.21 | 0.76 - 1.91 | |
| 3º (good) | *ref* | *-* | *ref* | *-* |  | *ref* | *-* | | *ref* | *-* | |
| From 18 y to 22 y |  |  |  |  |  |  |  | |  |  | |
| IQD-R continuity in tertile |  |  |  |  |  |  |  | |  |  | |
| Always poor | **2.78** | **1.57 - 4.95** | **2.86** | **1.48 - 5.53** |  | **2.74** | **1.54 - 4.87** | | **2.81** | **1.46 - 5.42** | |
| Intermediate | **1.70** | **1.01 - 2.87** | 1.64 | 0.92 - 2.93 |  | **1.68** | **1.00 - 2.83** | | 1.54 | 0.86 - 2.74 | |
| Always good | *ref* | *-* | *ref* | *-* |  | *ref* | *-* | | *ref* | *-* | |

**p value<0.05**

* Logistic regression

** Ordinal logistic regression

Only participants without wheezing at 18 years of age

Adjustment variables: sex, skin color, assets index, participant schooling, head of a family schooling, maternal history of asthma, alcohol abuse, physical activity, and corticosteroid or inhaler use.
